# Supplementary material for: Fecal Metabolomics Reveals Distinct Profiles of Kidney Transplant Recipients and Healthy Controls
Source: MDPI journal article supplement (doi:10.3390/diagnostics11050807), 2021-04-29

**Supplementary Table S1:** Clinical and demographic data of Kidney transplanted patients

| Patient | Age | Sex | PD    | Immunosuppression | Months after Tx | Associated Diseases | DD (mg) | ATH        | LLM     | BMI   |
|---------|-----|-----|-------|-------------------|-----------------|---------------------|---------|------------|---------|-------|
| P1      | 21  | M   | Ind N | Str/Rapa          | 12              | -                   | 2       | -          | -       | 18,04 |
| P2      | 53  | M   | CN    | Str/FK            | 156             | T2D/HBP             | 1       | -          | -       | 29,7  |
| P3      | 35  | F   | TIN   | FK /AZA           | 120             | -                   | -       | -          | -       | 18,3  |
| P4      | 47  | M   | Ind N | Str/CsA /MMF      | 60              | HU/HBP              | 1       | -          | -       | 31,7  |
| P5      | 67  | M   | CRAN  | Str/FK /MMF       | 264             | HU/HBP/DysLP        | 1       | CEI        | -       | 26,5  |
| P6      | 37  | M   | -     | Str/FK /MMF       | 84              | HU/HBP/NCA          | 1       | CEI/CCB    | CLS     | 28,08 |
| P7      | 37  | M   | CRAN  | FK /MMF           | 60              | -                   | 4       | CEI        | -       | 26,9  |
| P8      | 66  | M   | VN    | Str/FK /MMF       | 72              | HBP/H Str           | 4       | CCB        | -       | 26,3  |
| P9      | 48  | F   | Ind N | Str/FK /AZA       | 96              | -                   | -       | -          | -       | 16,13 |
| P10     | 18  | F   | CTIN  | Str/FK            | 24              | Car S               | 4       | -          | -       | 19,2  |
| P11     | 29  | M   | Ind N | Str/FK /MMF       | 144             | -                   | 2       | -          | -       | 15,8  |
| P12     | 58  | M   | IN    | Str/FK /MMF       | 96              | HU/HBP              | 5       | CCB/BB     | -       | 24,48 |
| P13     | 33  | F   | SLE   | Str/FK /MMF       | 12              | DysLP               | -       | -          | -       | 19,9  |
| P14     | 56  | M   | Ind N | Str/FK /MMF       | 72              | T2D/HBP/NCA/DysLP   | -       | CEI/CCB/BB | CLS     | 30,8  |
| P15     | 39  | M   | -     | Str/FK /MMF       | 48              | T2D/HBP/DysLP       | -       | CEI/CCB    | LovaCLS | 27,5  |
| P16     | 57  | M   | CRAN  | Str/FK /AZA       | 72              | DysLP               | 6       | CEI        | Lip     | 23,5  |
| P17     | 53  | M   | Ind N | Str/FK /MMF       | 84              | T2D/HBP/NCA         | -       | CEI/CCB    | CLS     | 32,5  |
| P18     | 51  | M   | DN    | Str/CsA /MMF      | 84              | T2D/HBP/DysLP       | 225     | CCB/BB     | Lip     | 24,5  |
| P19     | 46  | M   | Ind N | Str/FK /MMF       | 96              | DysLP               | 3       | CEI/CCB    | CLS     | 24,2  |
| P20     | 36  | F   | Ind N | Str/FK /MMF       | 156             | HBP/DysLP           | 5       | CEI/CCB/BB | Lip     | -     |
| P21     | 60  | F   | CGN   | Str/FK /AZA       | 60              | T2D/DysLP           | -       | -          | -       | 37,7  |
| P22     | 17  | M   | TIN   | Str/FK /MMF       | 108             | -                   | 3       | -          | Lip     | 20,7  |
| P23     | 26  | M   | -     | Str/FK /MMF       | 12              | -                   | -       | -          | -       | 20,3  |
| P24     | 42  | F   | CGN   | Str/FK /AZA       | 36              | -                   | -       | -          | -       | 32    |
| P25     | 43  | F   | CGN   | Str/CsA /AZA      | 168             | -                   | -       | -          | -       | 29,9  |
| P26     | 42  | F   | Ind N | Str/FK /MMF       | -               | HBP                 | -       | -          | -       | 25,5  |
| P27     | 50  | F   | SLE   | Str/FK /MMF       | 120             | -                   | 5       | CCB/BB     | -       | 32,6  |
| P28     | 41  | M   | Ind N | Str/FK /MMF       | 36              | SNHL                | -       | CEI/CCB    | -       | 24,6  |
| P29     | 27  | M   | Ind N | FK /AZA           | 96              | NCA                 | -       | CEI        | -       | 19,9  |
| P30     | 61  | M   | -     | Str/CsA /MMF      | 216             | HBP/CAD             | -       | CEI/CCB/BB | -       | 27,3  |
| P31     | 43  | F   | Ind N | Str/FK /AZA       | 144             | HU                  | -       | -          | CLS     | -     |
| P32     | 37  | M   | TIN   | Str/FK /MMF       | 8               | HBP                 | -       | CCB/BB     | -       | 21,3  |
| P33     | 30  | M   | Ind N | Str/FK /MMF       | 3               | T2D/DysLP           | -       | -          | -       | -     |
| P34     | 50  | M   | VN    | Str/FK /MMF       | 84              | T2D/HBP/DysLP       | -       | CCB/BB     | Lip     | 27,16 |
| P35     | 41  | M   | GN    | Str/FK /MMF       | 132             | T2D/DysLP           | -       | -          | CLS     | -     |
| P36     | 30  | M   | Ind N | Str/Rapa          | 7               | -                   | -       | -          | CLS     | -     |
| P37     | 39  | M   | Ind N | Str/FK /MMF       | 10              | DysLP               | -       | -          | -       | 23,18 |
| P38     | 47  | M   | IN    | Str/CsA /MMF      | 216             | H Str               | 225     | -          | Lip     | 26,5  |
| P39     | 42  | F   | -     | Str/FK /MMF       | 120             | HBP/NCA             | -       | CEI/CCB    | -       | 25,4  |
| P40     | 44  | M   | VN    | Str/FK /MMF       | 108             | HBP/DysLP           | -       | CEI/CCB    | -       | 23,6  |

PD= Ind N: Indeterminate Nephropathy; CGN: chronic glomerulonephritis; GN: glomerulonephritis; SLE: Lupus nephritis ; TIN: tubulointerstitial Nephritis; CTIN: chronic tubulointerstitial Nephritis; IN: Interstitial Nephritis; CN: chronic nephropathy; CRAN: chronic renal allograft nephropathy; VN: vascular nephropathy  
Immunosuppression= Str: steroids Rapa:Rapamicin (Sirolimus); FK: Tacrolimus ; CsA:cyclosporin; MMF: mecophenolate mofetil ; AZA: Azathioprine  
AD= T2D: type 2 Diabetes; HPB: hyper blood pressure; HU: hyperuricemia; DysLP: Dyslipidemia; HStr: Hemorrhagic stroke; SNHL: Sensorineural hearing loss; NCA: Neurocirculatory asthenia; CAD: coronary artery disease  
DD= Daily dose of (CsA, FK, Rapa)  
AHT= Antihypertensives ;CEI: angiotensin-converting enzyme inhibitor ; CCB: calcium channel blockers; BB: Beta blockers  
LLM= Lipid lowering medications; CLS: statin; LovaCLS: lovastatin; LIP: lipanthyl

Figure S1

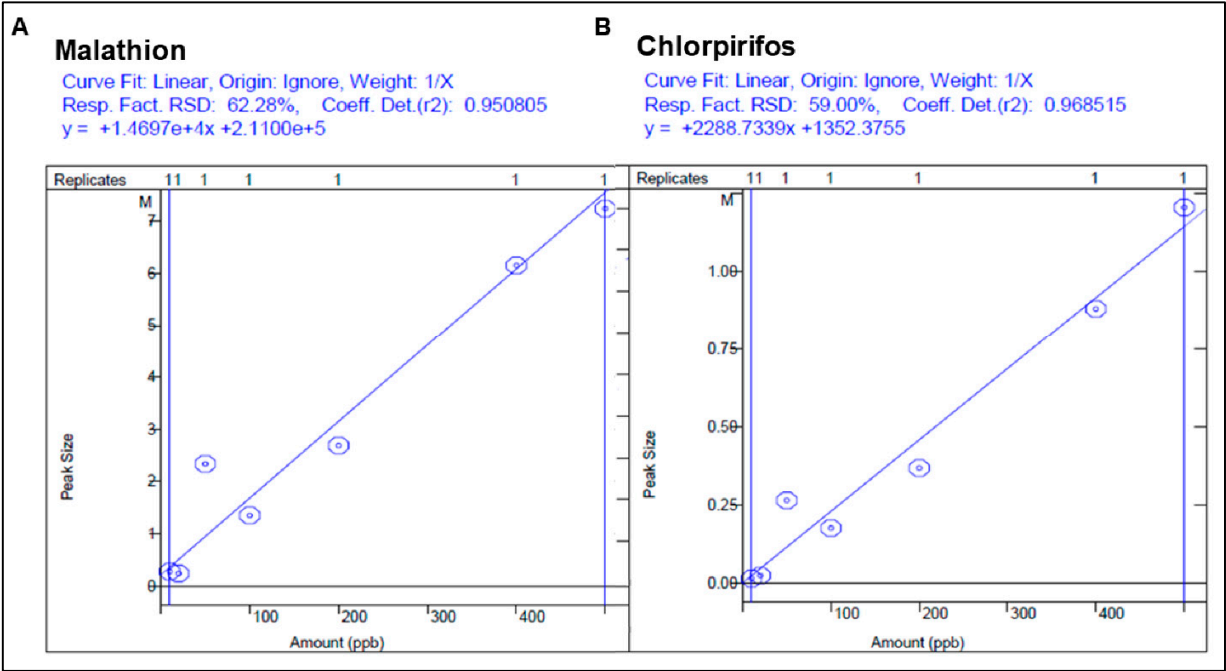

Figure S2

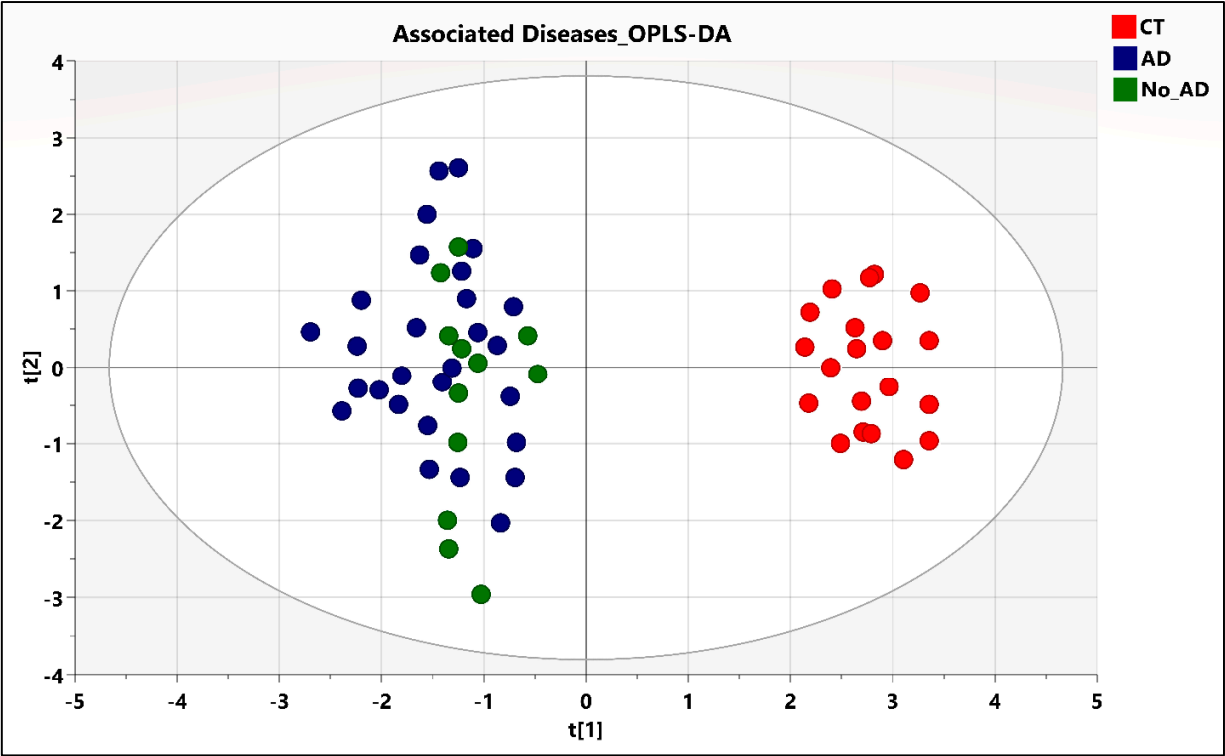

Figure S3

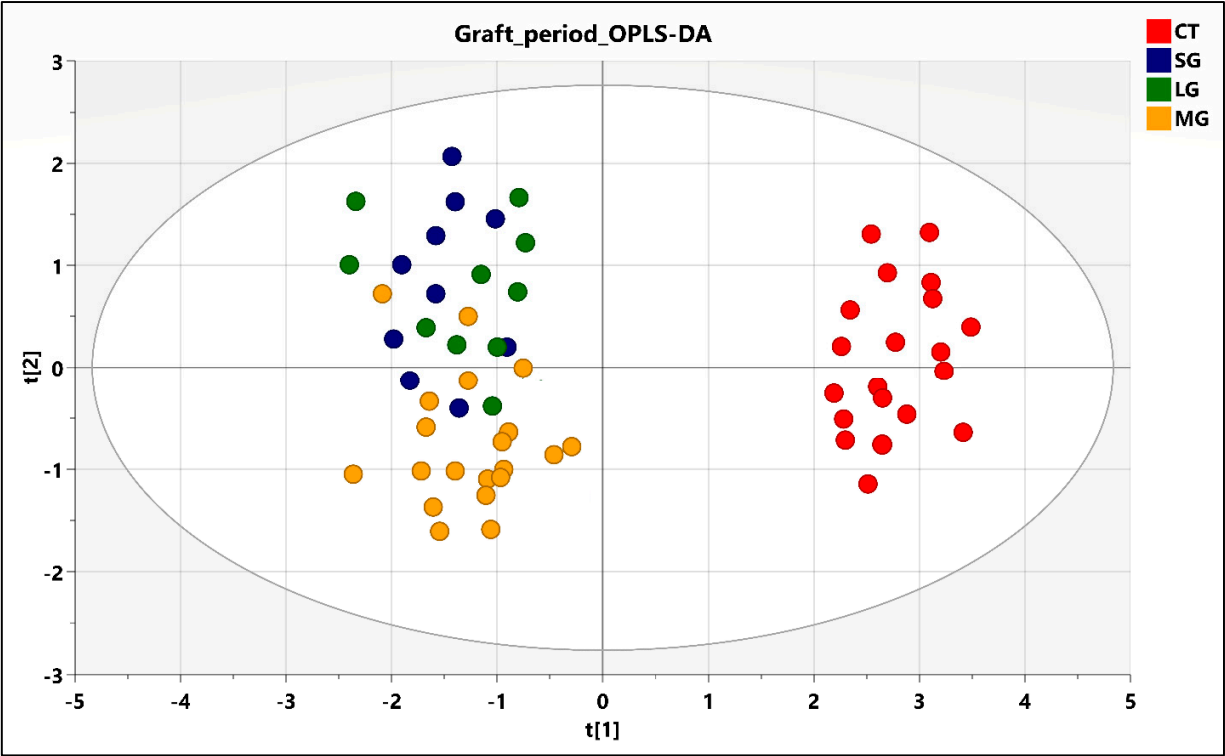

Supplement: s1 [file s1]
